# Supplementary material for: Effects and Impacts of Different Oxidative Digestion Treatments on Virgin and Aged Microplastic Particles
Source: MDPI journal article supplement (doi:10.3390/polym14101958), 2022-05-11
Supplement: s1 [file s1]

# Supplementary material

## Effects and impacts of different oxidative digestion treatments on virgin and aged Microplastic particles

Ilaria Savino <sup>1,2</sup>, Claudia Campanale <sup>1\*</sup>, Pasquale Trotti <sup>3</sup>, Carmine Massarelli <sup>1</sup>, Giuseppe Corriero <sup>2</sup> and Vito Felice Uricchio <sup>1</sup>

<sup>1</sup> Italian National Council of Research - Water Research Institute – Bari, Italy

<sup>2</sup> Department of Biology, University of Bari Aldo Moro, Bari, Italy

<sup>3</sup> Dipartimento di Scienze del Suolo, della Pianta e degli Alimenti – Sezione di Entomologia e Zoologia Agraria - University of Bari Aldo Moro, Bari, Italy

\* Correspondence: [claudia.campanale@ba.irsra.cnr.it](mailto:claudia.campanale@ba.irsra.cnr.it)

*Virgin MPs Treatment: 30 °C, 60 mL H<sub>2</sub>O<sub>2</sub>*

*Before treatment*

*After treatment*

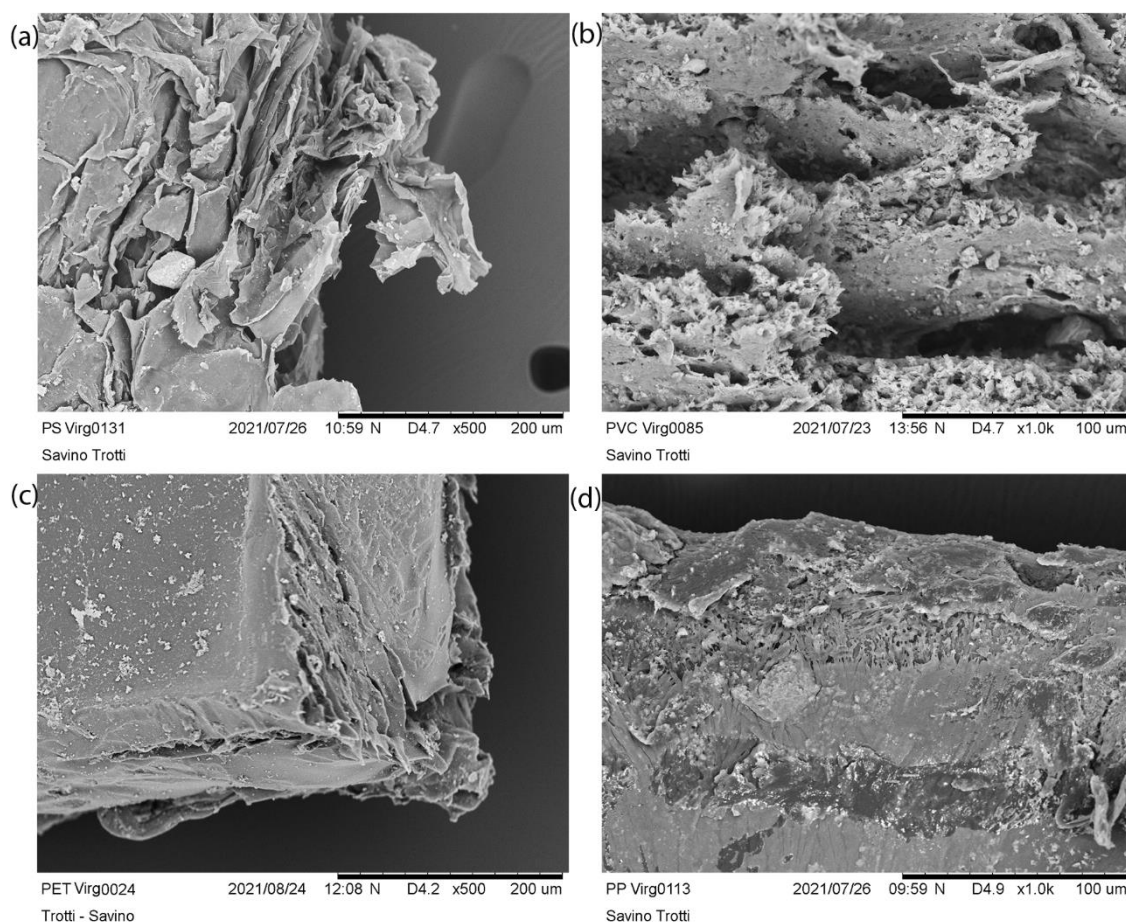

Figure S1. Detail on the effects of treatment at 30°C on polymers: a) slight damage to the PS; b) formation of small holes on the surface of the PVC; c) corrosion of PET margins; d) abrasion and corrosion of PP margins.

*Virgin MPs Treatment: 50 °C, 60 mL H<sub>2</sub>O<sub>2</sub>*

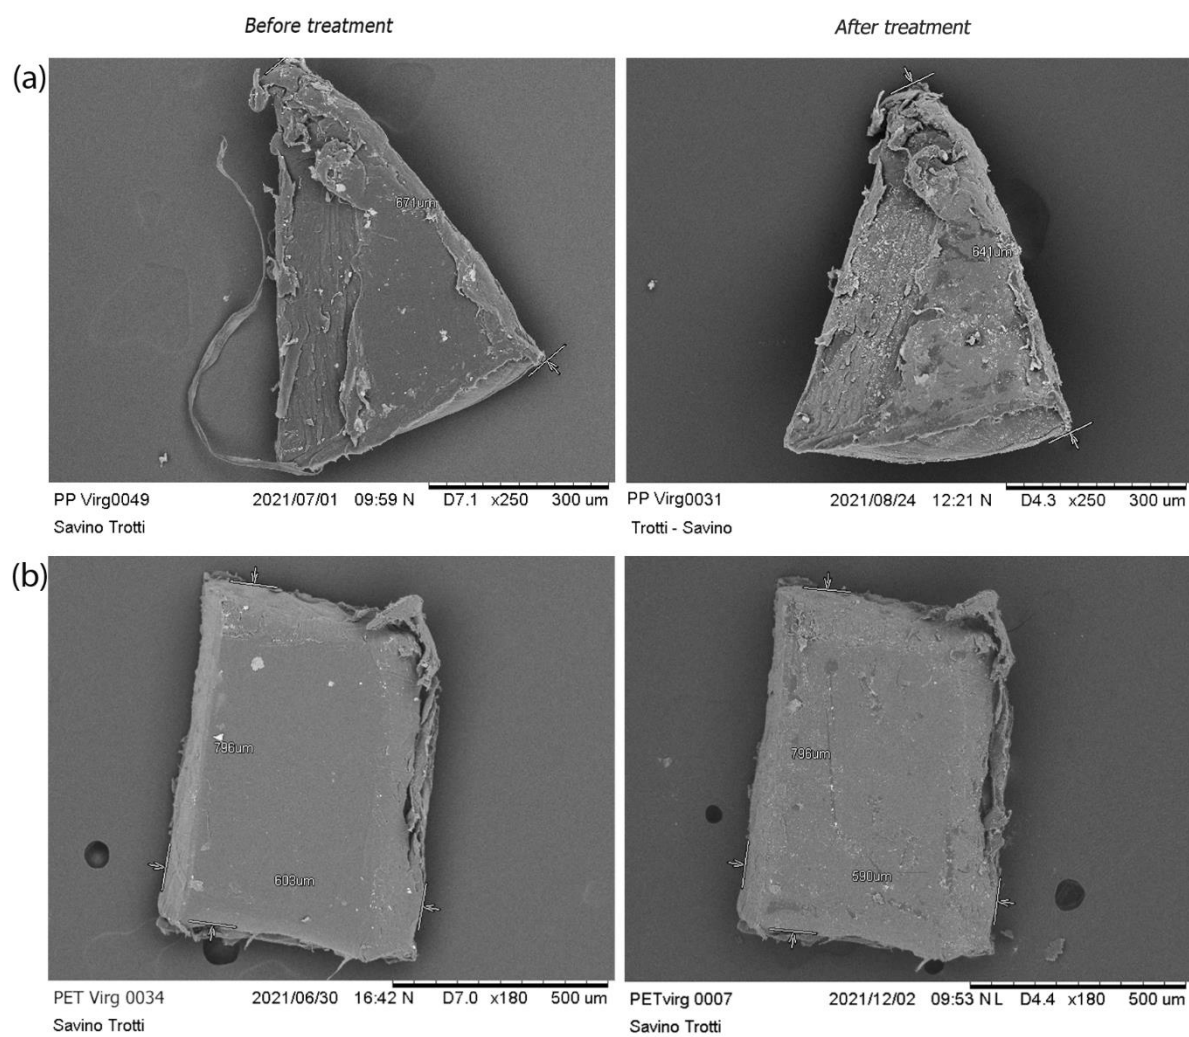

Figure S2. Slight size alteration caused by treatment at 50°C on virgin PP (a) and PET (b).

*Virgin MPs Treatment: 75 °C, 100 mL H<sub>2</sub>O<sub>2</sub>*

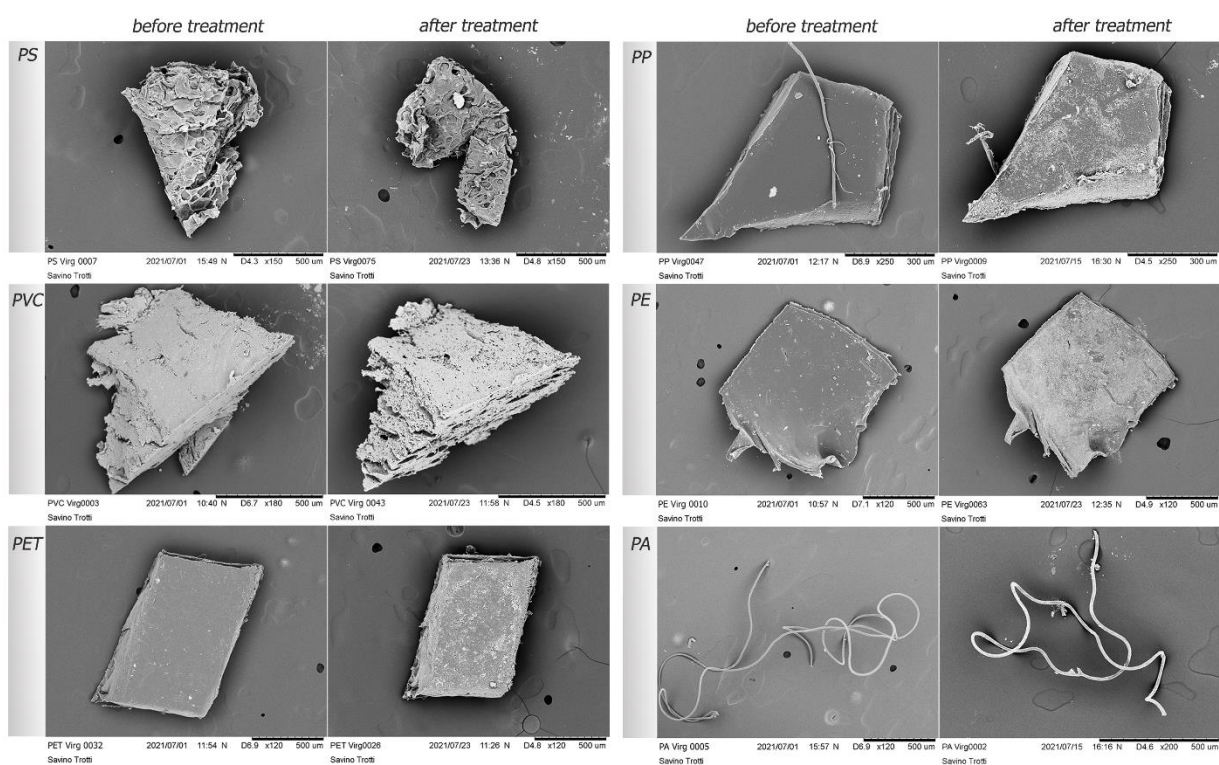

Figure S3. Overview of virgin polymer morphology before and after treatment at 75°C: loss of polymer material in PS; formation of large holes in the inside of PVC; corrosion of PP and PET margins, high resistance to PE and PA treatment.

## Virgin MPs

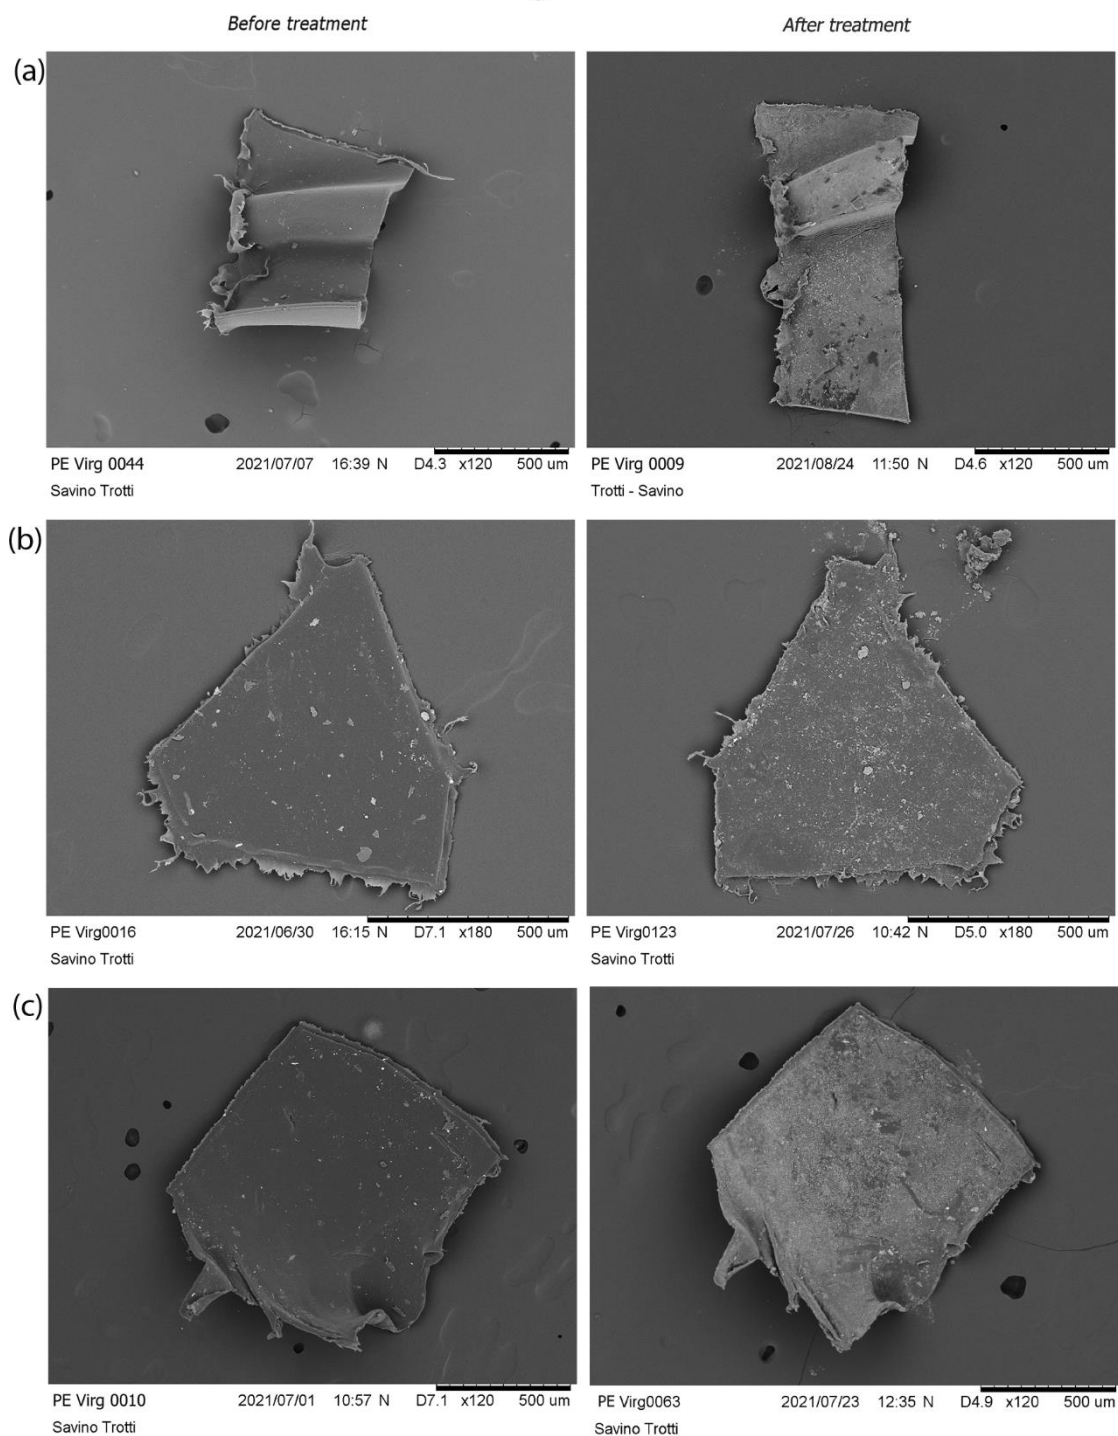

Figure S4. Visual demonstration of the high resistance of virgin PE after treatment at 30°C (a); treatment at 50°C (b), and 75°C (c).



*Aged MPs Treatment: 30 °C, 60 mL H<sub>2</sub>O<sub>2</sub>*

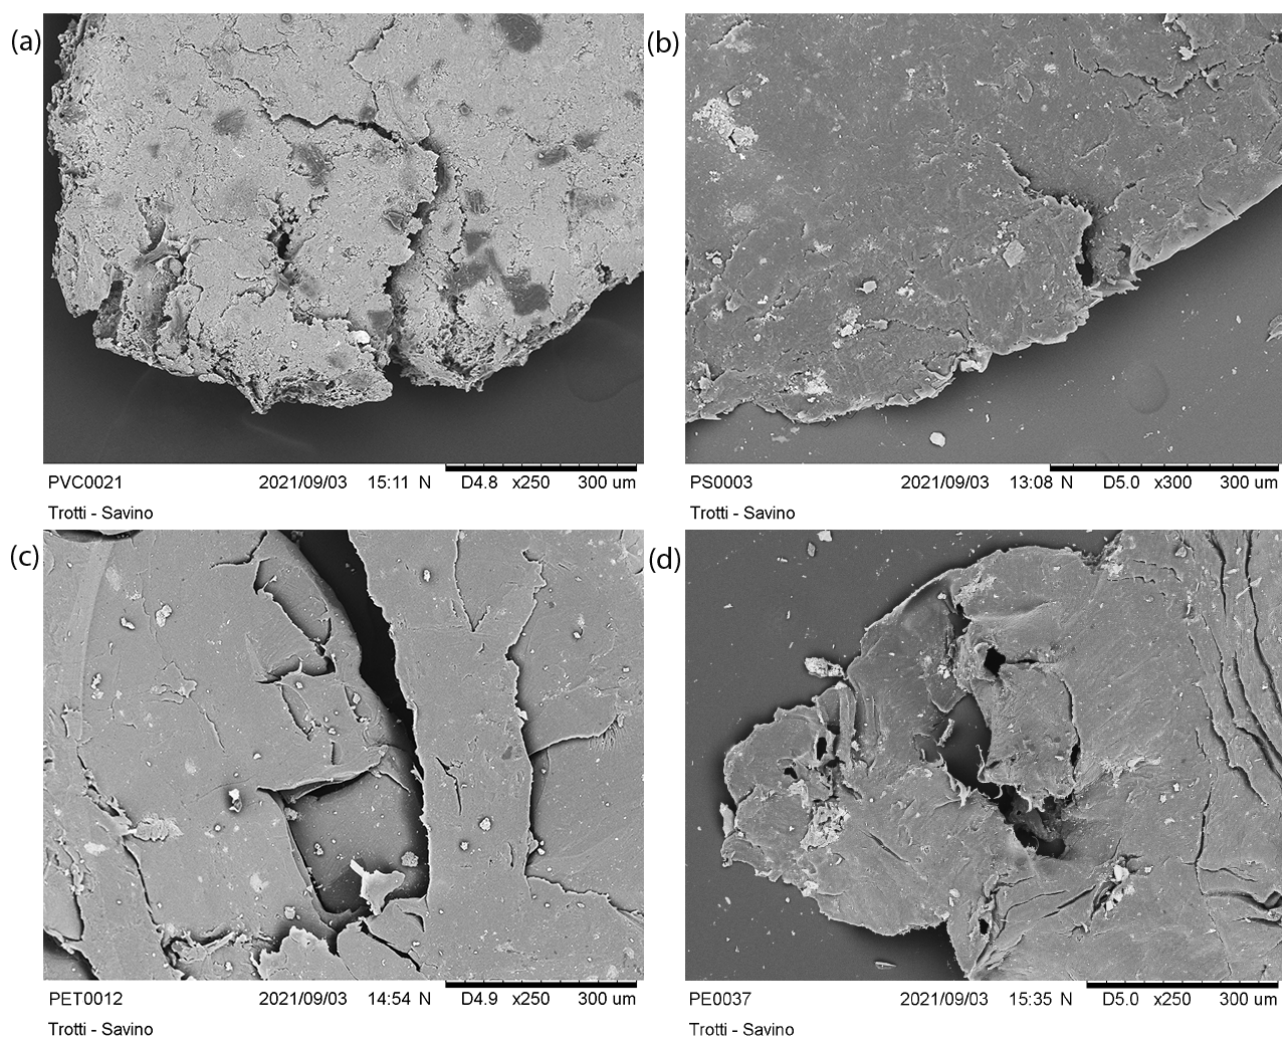

Figure S5. Focus on damage caused by treatment at 30°C on aged MPs: formation of cracks and breaks on PVC (a); PS (b); PET (c) and PE (d).

*Aged MPs Treatment: 75 °C, 100 mL H<sub>2</sub>O<sub>2</sub>*

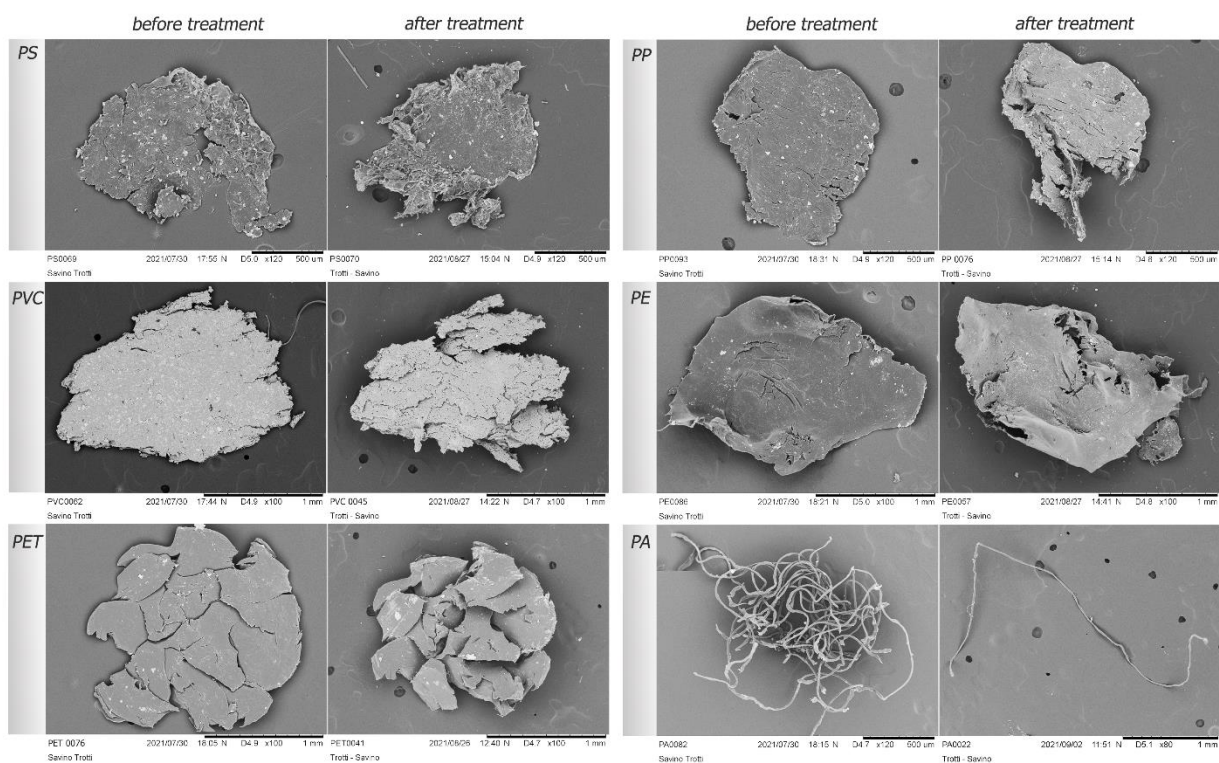

Figure S6. Overview of aged polymer morphology before and after treatment at 75°C: loss of material of PVC, PS and PP particles, cracks expansion of PET, PE corrosion and a fraying of PA.
